# Supplementary material for: Extracellular Vesicles and Exosomes: Insights From Exercise Science
Source: PubMed Central journal article supplement (PMC7882633; doi:10.3389/fphys.2020.604274), 2021-02-01
Supplement: Table_1.pdf [file Table_1.pdf]

| Publication                    | Exercise Protocol                                                                                                                          | Bio-fluid | Author-used Terminology   | Isolation Method               | miRNA Methodology                                     | miRNA Species                                                                                                                                                     | Collection Time Periods<br>miRNA results                                      |                                                          |                       |
|--------------------------------|--------------------------------------------------------------------------------------------------------------------------------------------|-----------|---------------------------|--------------------------------|-------------------------------------------------------|-------------------------------------------------------------------------------------------------------------------------------------------------------------------|-------------------------------------------------------------------------------|----------------------------------------------------------|-----------------------|
| <b>ACUTE EXERCISE STIMULUS</b> |                                                                                                                                            |           |                           |                                |                                                       |                                                                                                                                                                   |                                                                               |                                                          |                       |
|                                |                                                                                                                                            |           |                           |                                |                                                       |                                                                                                                                                                   | 2h                                                                            | 24h                                                      |                       |
|                                |                                                                                                                                            |           |                           |                                |                                                       |                                                                                                                                                                   | <u>Post-Ex</u>                                                                | <u>Post-Ex</u>                                           |                       |
| Lovett et al., 2018            | PMJ (10 x 10 maximal jumps) followed by DHR (5 x 4 min DHR at 10km/h at 10% decline) in untrained males                                    | PLA       | EVs in exosome size range | DC SEC                         | TaqMan Advanced miRNA assays                          | miR-1<br>miR-31<br>miR-133a<br>miR-133b<br>miR-206<br>miR-208b<br>miR-486<br>miR-499a                                                                             | ↔<br>↑<br>↔<br>↔<br>ND<br>↔<br>↔<br>↔<br>ND                                   | ↔<br>↑<br>↔<br>↔<br>ND<br>↔<br>↔<br>↔<br>ND              |                       |
|                                |                                                                                                                                            |           |                           |                                |                                                       |                                                                                                                                                                   | <u>Post-Ex</u>                                                                | 4h<br><u>Post-Ex</u>                                     |                       |
| D'Souza et al., 2018           | 10 x 60s intervals of cycling at peak power output in healthy men                                                                          | PLA       | Exosomes                  | DC SEC<br>0.22 μm filter       | TaqMan Advanced miRNA assays (n = 29, not all listed) | miR-1-3p<br>miR-16-5p<br>miR-23a-3p<br>miR-23b-3p<br>miR-126-3p<br>miR-150-5p<br>miR-186-5p<br>miR-208a-3p<br>miR-222-3p<br>miR-378a-5p<br>miR-451a<br>miR-486-5p | ↑<br>↑<br>↑<br>↑<br>↑<br>↑<br>↑<br>↑<br>↑<br>↑<br>↑<br>↑                      | ↔<br>↔<br>↔<br>↔<br>↔<br>↔<br>↔<br>↔<br>↔<br>↔<br>↔<br>↔ |                       |
|                                |                                                                                                                                            |           |                           |                                |                                                       |                                                                                                                                                                   | <u>Not Detectable (ND)</u>                                                    |                                                          |                       |
|                                |                                                                                                                                            |           |                           |                                |                                                       | miR-423-5p<br>miR-149-5p<br>miR-494-3p<br>miR-24-1-5p<br>miR-27a-5p<br>miR-33a-3p                                                                                 | miR-133a-3p<br>miR-191-5p<br>miR-206<br>miR-320a<br>miR-361-5p<br>miR-499a-3p |                                                          |                       |
|                                |                                                                                                                                            |           |                           |                                |                                                       |                                                                                                                                                                   | <u>Post-Ex</u>                                                                |                                                          |                       |
| Guescini et al., 2015          | 40 min vigorous intensity treadmill running (15 min warm-up followed by 40 min at ~80% VO <sub>2max</sub> at 1% grade) in well-trained men | PLA       | EVs                       | DC 0.22 μm filter<br>UC<br>IBI | TaqMan Advanced miRNA assays                          | miR-1<br>miR-24<br>miR-133a<br>miR-133b<br>miR-136a<br>miR-181a-5p<br>miR-206<br>miR-499                                                                          | ↔<br>↔<br>↔<br>↔<br>↔<br>↑<br>↔<br>↔                                          |                                                          |                       |
|                                |                                                                                                                                            |           |                           |                                |                                                       |                                                                                                                                                                   | <u>Post-Ex</u>                                                                | 2h<br><u>Post-Ex</u>                                     | 48h<br><u>Post-Ex</u> |
| Annibalini et al., 2019        | Resistance training (5 x 10 maximal squats, 3 min rest interval) on a flywheel in trained men                                              | PLA       | EVs                       | DC<br>UC                       | miRCURY LNA miRNA PCR Assay                           | miR-126-3p<br>miR-133b<br>miR-146a-5p<br>miR-206                                                                                                                  | ↔<br>↔<br>↑<br>↑                                                              | ↔<br>↔<br>↔<br>↔                                         | ↔<br>↔<br>↔<br>↔      |



| Publication                      | Exercise Protocol                                                                                                        | Bio-fluid | Author-used Terminology | Isolation Method                       | miRNA Methodology                                | miRNA Species | Collection Time Periods<br>miRNA results |
|----------------------------------|--------------------------------------------------------------------------------------------------------------------------|-----------|-------------------------|----------------------------------------|--------------------------------------------------|---------------|------------------------------------------|
| <b>CHRONIC EXERCISE TRAINING</b> |                                                                                                                          |           |                         |                                        |                                                  |               |                                          |
| Chaturvedi et al., 2015          | 8-wk treadmill training in db/+ mice (7 m·min <sup>-1</sup> ) and db/db mice (10 m·min <sup>-1</sup> ) for 300m/d, 5d/wk | SER       | Exosomes                | DC<br>0.2 µm filter<br>UC              | Custom design (synthetic miRNA oligonucleotides) | miR-455       | <u>Following Training</u><br>↑           |
|                                  |                                                                                                                          |           |                         |                                        |                                                  | miR-29b       | ↑                                        |
|                                  |                                                                                                                          |           |                         |                                        |                                                  | miR-323-5p    | ↔                                        |
|                                  |                                                                                                                          |           |                         |                                        |                                                  | miR-466       | ↔                                        |
| Hou et al., 2019                 | 4-wk swimming training (10m progressed to 90m/day ~7days/wk) in Sprague-Dawley rats                                      | PLA       | Exosomes                | DC<br>Exoquick™<br>Precipitation<br>UC | miRNA library sequencing (Commercial service)    | miR-3571      | <u>Following Training</u><br>↑           |
|                                  |                                                                                                                          |           |                         |                                        |                                                  | miR-1-3p      | ↑                                        |
|                                  |                                                                                                                          |           |                         |                                        |                                                  | miR-342-5p    | ↑                                        |
|                                  |                                                                                                                          |           |                         |                                        |                                                  | miR-122-5p    | ↑                                        |
|                                  |                                                                                                                          |           |                         |                                        |                                                  | miR-196b-5p   | ↑                                        |
|                                  |                                                                                                                          |           |                         |                                        |                                                  | miR-486       | ↑                                        |
|                                  |                                                                                                                          |           |                         |                                        |                                                  | miR-208-3p    | ↑                                        |
|                                  |                                                                                                                          |           |                         |                                        |                                                  | miR-3591      | ↑                                        |
|                                  |                                                                                                                          |           |                         |                                        |                                                  | miR-184       | ↑                                        |
|                                  |                                                                                                                          |           |                         |                                        |                                                  | miR-760-3p    | ↑                                        |
|                                  |                                                                                                                          |           |                         |                                        |                                                  | miR-99a-5p    | ↑                                        |
|                                  |                                                                                                                          |           |                         |                                        |                                                  | miR-191-5p    | ↓                                        |
|                                  |                                                                                                                          |           |                         |                                        |                                                  | miR-494-3p    | ↔                                        |
| miR-206-3p                       | ↔                                                                                                                        |           |                         |                                        |                                                  |               |                                          |

**Supplementary Table 1: The effect of acute or chronic exercise on miRNA abundance in ELV-enriched blood borne fractions.** DC; differential centrifugation; DHR: downhill running; EM: electron microscopy; EV: Extracellular Vesicles; IBI; Immuno-bead isolation; PLA; Plasma; PMJ: plyometric jumping; RT; recreationally trained prior to study initiation, SEC: Size Exclusion Chromatography; SER: serum; UC: ultracentrifugation; UHR: uphill running; ↑; statistically significant increase, ↔ non-significant changes, ↓; significant decrease denoted by statistical tests performed in the publication of origin.
